# Supplementary material for: Tuberculosis detection and the challenges of integrated care in rural China: A cross-sectional standardized patient study
Source: PubMed Central journal article supplement (PMC5644979; doi:10.1371/journal.pmed.1002405), 2017-10-17
Supplement: pmed.1002405.s002.pdf [file pmed.1002405.s002.pdf]

**S1 Table. Provider Characteristics****Panel A: Facility Characteristics**

|                                                                          | <b>Village Clinics<br/>(N=46)</b> | <b>Township Health<br/>Centers (N=207)</b> |
|--------------------------------------------------------------------------|-----------------------------------|--------------------------------------------|
| Number of patients in catchment area                                     | 2291 (1834-2747)                  | 26184 (23380-28988)                        |
| Number of physicians working full time at the facility                   | 1.52 (1.27-1.78)                  | 7.68 (6.7-8.66)                            |
| Facility has X-Ray machine                                               | 0 (0%)                            | 185 (89%, 84-93)                           |
| Facility has professional staff able to use X-ray machine                | 0 (0%)                            | 115 (56%, 49-62)                           |
| Facility has sputum smear test equipment                                 | 0 (0%)                            | 4 (2%, 1-5)                                |
| Facility has professional staff able to use sputum smear test equipment  | 0 (0%)                            | 1 (0%, 0-3)                                |
| Facility has stethoscope                                                 | 45 (98%, 89-100)                  | 207 (100%, 98-100)                         |
| Facility has thermometer                                                 | 46 (100%, 92-100)                 | 207 (100%, 98-100)                         |
| Facility manages care of diagnosed TB patients                           | 36 (78%, 64-88)                   | 207 (100%, 98-100)                         |
| Facility has physicians charged full-time with management of TB patients | --                                | 52 (25%, 20-31)                            |
| Facility has physicians charged part-time with management of TB patients | --                                | 148 (71%, 65-77)                           |
| Patients with persistent cough in past two weeks                         | 5.09 (2.41-7.77)                  | 10.05 (8.12-11.97)                         |
| Number of TB patients being managed at end of calendar year 2014         | 1.05 (0.53-1.56)                  | 9.43 (8.02-10.84)                          |
| Number of suspected TB patients in calendar year 2014                    | 1.18 (0.47-1.9)                   | 8.88 (7.23-10.52)                          |
| To where are suspected TB patients generally referred?                   |                                   |                                            |
| Township Health Center                                                   | 3 (7%, 2-18)                      | 0 (0%)                                     |
| County Hospital                                                          | 3 (7%, 2-18)                      | 50 (24%, 19-30)                            |
| City Hospital                                                            | 0 (0%)                            | 5 (2%, 1-6)                                |
| CDC                                                                      | 34 (77%, 63-87)                   | 142 (69%, 62-75)                           |
| Rewards for discovered TB cases                                          |                                   |                                            |
| Facility receives reward                                                 | 9 (20%, 11-33)                    | 44 (21%, 16-27)                            |
| If yes, facility reward amount ( <i>yuan</i> )                           | 19.33 (9.33-29.33)                | 35.31 (26.02-44.6)                         |
| Physicians receive reward                                                | 9 (20%, 11-33)                    | 73 (35%, 29-42)                            |
| If yes, physician reward amount ( <i>yuan</i> )                          | 19.33 (9.33-29.33)                | 18.67 (16.33-21.01)                        |
| Training                                                                 |                                   |                                            |
| Physicians have received Tuberculosis-specific training in 2014          | 30 (65%, 51-77)                   | 164 (79%, 73-84)                           |
| If yes, times                                                            | 2.83 (1.54-4.13)                  | 2.49 (2.14-2.85)                           |

**Panel B: Doctor Characteristics**

|                                                 | <b>Village Physicians<br/>(N=46)</b> | <b>Township<br/>Physicians (N=207)</b> |
|-------------------------------------------------|--------------------------------------|----------------------------------------|
| Practicing Physician Certificate                | 0 (0%)                               | 127 (61%, 55-68)                       |
| Assistant Practicing Physician Certificate      | 6 (13%, 6-26)                        | 48 (23%, 18-29)                        |
| Rural Physician Certificate                     | 39 (85%, 72-92)                      | 19 (9%, 6-14)                          |
| Age (years)                                     | 51.76 (49.13-54.39)                  | 44.38 (42.94-45.81)                    |
| Male                                            | 40 (87%, 74-94)                      | 178 (86%, 81-90)                       |
| Education, upper secondary or higher            | 4 (9%, 3-20)                         | 124 (60%, 53-66)                       |
| Monthly salary (1,000 <i>yuan</i> )             | 2.16 (1.71-2.6)                      | 3.42 (3.26-3.57)                       |
| Received Tuberculosis-specific training in 2014 | 30 (65%, 51-77)                      | 58 (28%, 22-34)                        |
| If yes, times                                   | 2.83 (1.54-4.13)                     | 1.57 (1.26-1.87)                       |

Notes: Data are mean (95% CI) or n (%; 95% CI). Values are unconditional unless otherwise stated.
