# Supplementary material for: Tuberculosis detection and the challenges of integrated care in rural China: A cross-sectional standardized patient study
Source: PubMed Central journal article supplement (PMC5644979; doi:10.1371/journal.pmed.1002405), 2017-10-17
Supplement: pmed.1002405.s003.pdf [file pmed.1002405.s003.pdf]

**S2 Table. Completion of Checklist Items**

|                                                  | <b>Village<br/>Clinics</b> | <b>Township<br/>Health<br/>Centers</b> | <b>County<br/>Hospitals</b> | <b>Total</b> |
|--------------------------------------------------|----------------------------|----------------------------------------|-----------------------------|--------------|
| <b>Questions</b>                                 |                            |                                        |                             |              |
| Cough duration <sup>12*</sup>                    | 0.61 (0.07)                | 0.85 (0.03)                            | 0.76 (0.10)                 | 0.80 (0.02)  |
| (Produced) Sputum <sup>12*</sup>                 | 0.43 (0.07)                | 0.58 (0.03)                            | 0.38 (0.11)                 | 0.54 (0.03)  |
| Past tuberculosis <sup>2*</sup>                  | 0.00 (0.00)                | 0.06 (0.02)                            | 0.05 (0.05)                 | 0.05 (0.01)  |
| Family tuberculosis <sup>2*</sup>                | 0.00 (0.00)                | 0.03 (0.01)                            | 0.05 (0.05)                 | 0.03 (0.01)  |
| Blood in sputum <sup>12</sup>                    | 0.11 (0.05)                | 0.12 (0.02)                            | 0.05 (0.05)                 | 0.11 (0.02)  |
| Fever (duration) <sup>12</sup>                   | 0.26 (0.07)                | 0.40 (0.03)                            | 0.48 (0.11)                 | 0.38 (0.03)  |
| Fever type <sup>12</sup>                         | 0.24 (0.06)                | 0.24 (0.03)                            | 0.24 (0.10)                 | 0.24 (0.03)  |
| Chest pain <sup>2</sup>                          | 0.09 (0.04)                | 0.11 (0.02)                            | 0.10 (0.07)                 | 0.10 (0.02)  |
| (Loss of) Appetite <sup>12</sup>                 | 0.07 (0.04)                | 0.10 (0.02)                            | 0.00 (0.00)                 | 0.09 (0.02)  |
| Lost weight <sup>12</sup>                        | 0.00 (0.00)                | 0.02 (0.01)                            | 0.05 (0.05)                 | 0.02 (0.01)  |
| Breathing difficulty <sup>12</sup>               | 0.00 (0.00)                | 0.14 (0.02)                            | 0.05 (0.05)                 | 0.11 (0.02)  |
| Wheezing <sup>12</sup>                           | 0.02 (0.02)                | 0.08 (0.02)                            | 0.00 (0.00)                 | 0.06 (0.01)  |
| (Take) Any medicines <sup>2</sup>                | 0.46 (0.07)                | 0.63 (0.03)                            | 0.29 (0.10)                 | 0.57 (0.03)  |
| Smoking <sup>2</sup>                             | 0.07 (0.04)                | 0.07 (0.02)                            | 0.05 (0.05)                 | 0.07 (0.02)  |
| Diabetes <sup>2</sup>                            | 0.00 (0.00)                | 0.01 (0.01)                            | 0.00 (0.00)                 | 0.01 (0.01)  |
| High blood pressure or hypertension <sup>2</sup> | 0.11 (0.05)                | 0.04 (0.01)                            | 0.00 (0.00)                 | 0.05 (0.01)  |
| HIV/AIDS <sup>2</sup>                            | 0.00 (0.00)                | 0.00 (0.00)                            | 0.00 (0.00)                 | 0.00 (0.00)  |
| Alcohol <sup>2</sup>                             | 0.00 (0.00)                | 0.05 (0.02)                            | 0.00 (0.00)                 | 0.04 (0.01)  |
| Age <sup>2</sup>                                 | 0.33 (0.07)                | 0.60 (0.03)                            | 0.43 (0.11)                 | 0.54 (0.03)  |
| Family symptoms <sup>2</sup>                     | 0.02 (0.02)                | 0.03 (0.01)                            | 0.00 (0.00)                 | 0.03 (0.01)  |
| Have cough throughout the day <sup>2</sup>       | 0.17 (0.06)                | 0.14 (0.02)                            | 0.05 (0.05)                 | 0.14 (0.02)  |
| Weakness <sup>1</sup>                            | 0.00 (0.00)                | 0.09 (0.02)                            | 0.05 (0.05)                 | 0.07 (0.02)  |
| Are there any night sweats present? <sup>1</sup> | 0.13 (0.05)                | 0.14 (0.02)                            | 0.14 (0.08)                 | 0.14 (0.02)  |
| <b>Exams</b>                                     |                            |                                        |                             |              |
| Weight <sup>12</sup>                             | 0.00 (0.00)                | 0.00 (0.00)                            | 0.00 (0.00)                 | 0.00 (0.00)  |
| Pulse <sup>2</sup>                               | 0.20 (0.06)                | 0.08 (0.02)                            | 0.00 (0.00)                 | 0.09 (0.02)  |
| Blood pressure <sup>2</sup>                      | 0.09 (0.04)                | 0.08 (0.02)                            | 0.00 (0.00)                 | 0.07 (0.02)  |
| Temperature <sup>12</sup>                        | 0.59 (0.07)                | 0.62 (0.03)                            | 0.19 (0.09)                 | 0.58 (0.03)  |
| Auscultation <sup>12</sup>                       | 0.48 (0.07)                | 0.43 (0.03)                            | 0.43 (0.11)                 | 0.44 (0.03)  |
| Chest radiograph <sup>12</sup>                   | 0.17 (0.06)                | 0.35 (0.03)                            | 0.90 (0.07)                 | 0.36 (0.03)  |
| Sputum smear test (Sputum AFB) <sup>12</sup>     | 0.00 (0.00)                | 0.04 (0.01)                            | 0.05 (0.05)                 | 0.04 (0.01)  |
| HIV test <sup>2</sup>                            | 0.00 (0.00)                | 0.00 (0.00)                            | 0.00 (0.00)                 | 0.00 (0.00)  |
| Diabetes test <sup>2</sup>                       | 0.00 (0.00)                | 0.00 (0.00)                            | 0.00 (0.00)                 | 0.00 (0.00)  |
| Mantoux Tuberculin Skin Test (TST) <sup>12</sup> | 0.00 (0.00)                | 0.00 (0.00)                            | 0.00 (0.00)                 | 0.00 (0.00)  |
| Sputum culture test <sup>1</sup>                 | 0.00 (0.00)                | 0.00 (0.00)                            | 0.00 (0.00)                 | 0.00 (0.00)  |

Notes: Data are proportion (se). <sup>1</sup> China Standard, <sup>2</sup> International (WHO) Standard, \* essential items.
