# Supplementary material for: Tuberculosis detection and the challenges of integrated care in rural China: A cross-sectional standardized patient study
Source: PubMed Central journal article supplement (PMC5644979; doi:10.1371/journal.pmed.1002405), 2017-10-17
Supplement: pmed.1002405.s004.pdf [file pmed.1002405.s004.pdf]

**S3 Table. Correlates of Correct Management, CXR, Referral, and Antibiotic Prescription of Standardized Patients among Village and Township Providers**

|                                                             | Correct Case Management | Chest X-Ray       | Referral          | Antibiotics      |
|-------------------------------------------------------------|-------------------------|-------------------|-------------------|------------------|
|                                                             | (1)                     | (2)               | (3)               | (4)              |
| Practicing Physician Certificate                            | 2.76**<br>(0.01)        | 2.95**<br>(0.01)  | 2.33*<br>(0.08)   | 0.37**<br>(0.02) |
| Facility has both X-ray equipment and staff able to operate | 5.25***<br>(0.00)       | 3.83***<br>(0.01) | 1.85<br>(0.27)    | 0.44**<br>(0.05) |
| Receive reward for discovered TB patients                   | 2.33**<br>(0.03)        | 2.17**<br>(0.05)  | 0.88<br>(0.79)    | 0.75<br>(0.45)   |
| Provider age (years)                                        | 0.94***<br>(0.00)       | 0.93***<br>(0.00) | 0.92***<br>(0.00) | 1.05**<br>(0.03) |
| Male provider                                               | 0.48<br>(0.15)          | 0.40*<br>(0.08)   | 0.79<br>(0.70)    | 2.05<br>(0.16)   |
| Provider education, upper secondary or higher               | 0.44*<br>(0.05)         | 0.40*<br>(0.05)   | 0.49<br>(0.15)    | 1.44<br>(0.40)   |
| Provider month salary (1,000 yuan)                          | 1.03<br>(0.85)          | 1.28<br>(0.15)    | 0.84<br>(0.32)    | 0.95<br>(0.74)   |
| Patient load (patients)                                     | 1.08<br>(0.37)          | 1.06<br>(0.51)    | 1.01<br>(0.93)    | 0.93<br>(0.40)   |
| Received TB training                                        | 0.96<br>(0.92)          | 0.97<br>(0.93)    | 1.34<br>(0.53)    | 0.78<br>(0.52)   |
| Village clinics                                             | 3.73**<br>(0.05)        | 1.92<br>(0.32)    | 2.33*<br>(0.08)   | 0.37**<br>(0.02) |
| Number of Observations                                      | 253                     | 253               | 216               | 253              |
| Mean of Outcome                                             | 0.36                    | 0.32              | 0.20              | 0.64             |

*Notes:* Results are reported as adjusted odds ratios. P-values are reported in parentheses under odds ratios. Correct case management is defined as a chest x-ray [CXR] or sputum test or referral. Regressions control for SP and county fixed effects. \* p<0.1, \*\* p<0.05, \*\*\* p<0.01.
