# Supplementary material for: Tuberculosis detection and the challenges of integrated care in rural China: A cross-sectional standardized patient study
Source: PubMed Central journal article supplement (PMC5644979; doi:10.1371/journal.pmed.1002405), 2017-10-17
Supplement: pmed.1002405.s006.pdf [file pmed.1002405.s006.pdf]

**S5 Table. Patient Selection into Health System Tiers with Symptoms of TB**

|                                                                                                             | N    | %     |
|-------------------------------------------------------------------------------------------------------------|------|-------|
| <b>Panel A: Hypothetical</b>                                                                                |      |       |
| If you or someone in your family had a cough and fever lasting for two weeks, would you go to see a doctor? | 1963 | 97.09 |
| If yes, which level of provider would you visit?                                                            |      |       |
| Village clinics                                                                                             | 897  | 45.7  |
| Township Health Centers                                                                                     | 606  | 30.87 |
| County Hospitals                                                                                            | 392  | 19.97 |
| City Hospitals or higher                                                                                    | 68   | 3.46  |
| <b>Panel B: Retrospective</b>                                                                               |      |       |
| Did you or someone in your family have a cough and fever lasting for two weeks or more in the year 2015?    | 315  | 15.58 |
| If yes, did you see a doctor?                                                                               | 294  | 93.33 |
| If yes, which level of provider did you visit?                                                              |      |       |
| Village clinics                                                                                             | 130  | 44.22 |
| Township Health Centers                                                                                     | 83   | 28.23 |
| County Hospitals                                                                                            | 61   | 20.75 |
| City Hospitals or higher                                                                                    | 20   | 6.8   |

*Source: Authors Data.*

*Notes: Nationally representative sample of 2,022 rural households.*
