# Supplementary material for: Tuberculosis detection and the challenges of integrated care in rural China: A cross-sectional standardized patient study
Source: PLOS journal article supplement (doi:10.1371/journal.pmed.1002405), 2017-10-17
Supplement: S8 (10.1371/journal.pmed.1002405.s008) [file journal.pmed.1002405.s008]

**S7 Table. Simulation of Out-of-Pocket Costs with and without Managed Referrals**

|                                                          | Patients Select Initial<br>Provider Level <sup>*</sup> | Managed Referrals <sup>§</sup> |                     |
|----------------------------------------------------------|--------------------------------------------------------|--------------------------------|---------------------|
|                                                          |                                                        | Start from VC                  | Start from THC      |
| % Correctly Managed with Straight Referrals <sup>†</sup> | 61.24 (49.76-72.71)                                    | 33.96 (25.76-42.15)            | 60.58 (40.42-80.73) |
| % Correctly Managed with True Referrals                  | 65.37 (50.69-80.05)                                    | 43.00 (24.83-61.17)            | 60.58 (40.42-80.73) |

*Notes:* Data are mean (95% CI). 6.5 RMB = \$1. <sup>\*</sup>Patient sorting in 'Patients Select Initial Provider Level' column based on a nationally representative sample of rural households: 45.7% at village, 30.87% at township, 23.43% at county. <sup>§</sup>Managed referrals refer to patients being required to initially visit providers at the village or township level. <sup>†</sup>"Straight Referrals" refers to referrals only being allowed to the next highest tier. "True Referrals" allow for bypassing.
